## Physicians' learning in the workplace: use of informal feedback cues in daily practice

### 1 Physicians' learning in the workplace: use of informal feedback cues in daily practice

#### 2 **ABSTRACT**

3 **Purpose:** We expect physicians to be lifelong learners. Learning from clinical practice is an  
4 important potential source for that learning. To support physicians in this process, a better  
5 understanding of how they learn in clinical practice is necessary. This study investigates how  
6 physicians use informal feedback as learning cues to adjust their communication from  
7 interactions with patients in the outpatient setting.

8 **Methods:** To understand physicians' use of informal feedback, we combined non-participant  
9 ethnographic observations with semi-structured interviews. We enrolled 10 respiratory  
10 physicians and observed 100 physician-patient interactions at one academic and one non-  
11 academic hospital in the Netherlands. Data collection and analysis were performed iteratively  
12 according to the principles of constructivist grounded theory. Our conceptual model describes  
13 how physicians use cues to reflect on and adjust their communication as well as to further  
14 develop their adaptive expertise.

15 **Results:** In addition to vast variations within and across patient encounters, we observed  
16 recurring patterns in physicians' communications in reaction to specific learning cues.  
17 Physicians had learnt to recognise and use different cues to adjust their communication in  
18 patient encounters. They established a 'communication repertoire' based on multiple patient  
19 interactions, which many saw as learning opportunities, contributing to the development of  
20 adaptive expertise. Our findings show differences in physicians' sensitivity to recognising  
21 learning opportunities in daily practice which was further influenced by contextual, personal and  
22 interpersonal factors. Whereas some reported to have little inclination to change, others used  
23 critical incidents to fine-tune their communication repertoire, while others constantly reshaped it,  
24 seeking learning opportunities in their daily work.

25 **Conclusions:** There is a large variation in how physicians use learning cues from daily practice.  
26 Learning from daily practice is a collaborative effort and requires a culture that promotes lifelong  
27 learning. Raising physicians' awareness of experiences as potential learning opportunities might  
28 enhance their development of adaptive expertise.

## Physicians' learning in the workplace: use of informal feedback cues in daily practice

### 29 INTRODUCTION

30 Certified physicians are expected to engage in lifelong learning. As such, they are often  
31 required to prove their participation in formal learning activities, such as courses or congresses  
32 which too often are didactic and primarily knowledge-based (1-3). In fact, research findings  
33 suggest that most of physicians' learning occurs informally through work (4-6). Compared to  
34 formal learning activities, informal learning is mostly unplanned, unconscious or tacit, and  
35 involves others through meaningful experiences in an authentic setting (7, 8). Informal learning  
36 can also be deliberate when physicians consciously aim to improve performance by, for  
37 example, seeking feedback or reflecting on experiences from their clinical practice, thereby  
38 engaging in self-regulated learning (4, 9-12). Feedback-seeking behaviour along with ongoing  
39 reflection on performance and performance feedback for the purpose of learning are at the  
40 heart of deliberate practice; fundamental to the development of professionals' adaptive  
41 expertise (12).

42 Making informal learning more explicit and deliberate, therefore, remains imperative for  
43 physicians' lifelong learning (4, 13). This specifically counts for further development and  
44 refinement of physicians' communication skills. Communication is a complex yet crucial skill in  
45 patient care (14) that is predominantly developed through practice and informal learning.

46 Feedback and reflection on interactions with patients or peers in the workplace may stimulate  
47 physicians' deliberate practice. It is well noted that certified physicians receive little formal  
48 feedback. Yet, informal feedback through other 'learning cues' including for example informal  
49 feedback from patient responses, clinical outcomes or conversations with colleagues,  
50 specifically reported by Watling and colleagues (15), may "facilitate the interpretation of the  
51 experience and the construction of knowledge from it" (15-17). However, it may be challenging  
52 for physicians to recognise those cues as cues for learning, as they can be ambiguous and are  
53 part of their daily routine (4). In day-to-day practice, physicians predominantly engage with  
54 patients using their routine expertise, while being less involved with their workplace learning  
55 (12). They may therefore benefit from support in how to recognise learning cues, as well as in  
56 knowing how to use and learn from them, so they may consider adapting and improving practice  
57 (2, 13, 15-17).

58 A better understanding of how physicians interpret meaningful experiences and use cues from  
59 daily practice as informal feedback may support strategies for physicians to develop their  
60 expertise, essential to ensure high-quality care (18). Our objectives, therefore, are to obtain an  
61 in-depth understanding of how physicians informally learn in and from the workplace (19). We  
62 aim to further refine theory on how physicians build and adapt expertise in the workplace setting  
63 (18). More specifically, we investigate how physicians recognise and reflect on learning cues  
64 related to their communication with patients and consequently, learn and adjust practice through  
65 patient interactions.

## Physicians' learning in the workplace: use of informal feedback cues in daily practice

### 66 **METHODS**

67 Using a constructivist grounded theory approach, we combined non-participant observations  
68 with semi-structured interviews (20).

### 69 **Setting and participants**

70 We approached physicians from an academic and a non-academic hospital in the Netherlands.  
71 To ensure homogeneity with respect to the area of patient care, we selected respiratory  
72 specialists working with outpatients in respiratory clinics. Respiratory medicine includes a varied  
73 patient population including acute, chronic and terminally ill patients, which often results in long-  
74 standing and intensive physician-patient relationships. We purposefully sampled respiratory  
75 specialists with variation in age, gender, subspecialisation and experience. After the first round  
76 of data analysis, the research team decided to include additional physicians who were in the  
77 beginning, in the middle or at the end of their career for theoretical sampling. All physicians  
78 consented to participate.

79 Upon registration for outpatient appointments, patients received a short letter, which informed  
80 them about the research, the presence of a researcher as an observer (CS) and were asked for  
81 consent. The participating physicians verbally briefed each individual patient, emphasising that  
82 the research focused on the physician, that no patient data would be collected, and that CS did  
83 not have a medical background. If, after starting the consultation, either physician or patient  
84 preferred the researcher not to be present, CS left the room.

85 We obtained ethical approval from the Netherlands Association for Medical Education (NVMO:  
86 file number 2018.7.9), and from the ethical committees of both participating hospitals (file  
87 numbers 2018-0864 and nWMO-2018.118).

### 88 **Data collection**

89 We combined data from non-participatory observations with informal and semi-structured  
90 interviews in an iterative design. CS shadowed 100 appointments of ten physicians in outpatient  
91 clinics. She observed physician-patient encounters and what cues physicians seemed to react  
92 to. She particularly focused on variations in communication styles during and across  
93 consultations and if, how and when physicians changed their communication with patients.  
94 During the observations, CS took field notes using ethnographic techniques, which she worked  
95 out after the observation within the following 48 hours. Observations lasted 1.5 to 3.5 hours,  
96 during which CS usually observed eight to twelve outpatient appointments (Table 1). CS sat  
97 with some distance from the physicians and patients, and asked participating physicians to  
98 conduct the clinic following a typical daily routine.

99 After the observations, CS used her notes to prepare interview questions on situations  
100 observed. Following this preparation (0.5 to 1.5 hours), CS conducted semi-structured  
101 interviews. During the interviews, physicians considered and reflected on cues they used to  
102 adjust their communication. First, CS inquired about changes she had observed in physicians'  
103 non-verbal or verbal communication during specific patient encounters. Second, her questions

## Physicians' learning in the workplace: use of informal feedback cues in daily practice

104 addressed differences in how physicians approached different patients. Drawing on these  
105 observations, CS probed the physicians interviewed on their awareness of the learning cues  
106 that led them to alter communication during interactions with patients. Semi-structured  
107 interviews lasted 30 to 55 minutes, and were recorded and transcribed verbatim. With the help  
108 of the transcriptions, notes were transformed into concrete reconstructions with analytic memos  
109 and commentaries (21). The data were subsequently analysed to obtain an in-depth  
110 understanding of the cues physicians considered relevant to their communication, and how they  
111 used these cues for learning.

112 **Table 1: Overview of physician-patient interactions observed**

| Interviewee  | Number of Patient encounters | Number of hours observed |
|--------------|------------------------------|--------------------------|
| A1           | 12                           | 3                        |
| A2           | 8                            | 2,5                      |
| A3           | 11                           | 3,5                      |
| A4           | 11                           | 2,5                      |
| A5           | 12                           | 3                        |
| A6           | 11                           | 3                        |
| A7           | 11                           | 3                        |
| A8           | 10                           | 3                        |
| A9           | 10                           | 3                        |
| A10          | 4*                           | 1,5                      |
| <b>Total</b> | <b>100</b>                   | <b>28</b>                |

113 \*One observation included four patient encounters in a highly specialised outpatient clinic for  
114 patients with a certain rare disease.

### 115 **Data analysis**

116 Data collection and data analysis were performed in an iterative manner, so that early analysis  
117 influenced the focus of the following observations and interviews. CS started by open, line-by-  
118 line coding of three interviews and the corresponding observational field notes. The authors FS,  
119 ED, PT, GR and MG each read and coded one interview transcript and related field notes and  
120 discussed their respective codes with CS independently. After refining the coding framework,  
121 the research team discussed and collated codes into preliminary categories. PT and CS jointly  
122 discussed these, which resulted in the following preliminary categories: context, physician-  
123 patient relationship, patient characteristics, anticipating or reactive change in communication,  
124 and routine. CS used the preliminary categories in focused coding of two more interview  
125 transcripts, before discussing categories with SM and PT separately. This led to the  
126 construction of the following additional categories: external factors, examples of learning cues  
127 (patient reaction, physician reaction), reflection, and communication repertoire. CS and SM  
128 conceptualised the categories into a conceptual model, based on which CS coded three more

## Physicians' learning in the workplace: use of informal feedback cues in daily practice

129 interviews. CS, SM, FS, ED and MG discussed and agreed on the conceptual model, and  
130 further deliberated how contextual factors affected physicians' decisions to react to and learn  
131 from cues or not. After CS had coded the two remaining transcripts, the research team re-  
132 examined the conceptual model and adjusted it into a final conceptual model of how physicians  
133 recognised and used informal feedback cues for their learning and how using cues resulted in a  
134 change of communicative behaviour.

135 We collected and analysed data until the authors felt that no new concepts came up and  
136 theoretical sufficiency was reached to answer the research question and to build theory (22,  
137 23). Data was managed with ATLAS.ti (ATLAS.ti Scientific Software Development GmbH,  
138 Berlin, Germany) and the analysis reported with the COREQ checklist (Appendix I).

### 139 Reflexivity

140 The research team maintained reflexivity throughout data collection, data analysis, and writing  
141 up the results by discussing underlying assumptions about physician-patient communication  
142 and learning cues. CS used reflective memos throughout data collection to reflect on how her  
143 own experiences and pre-constructed knowledge influenced the interpretation of findings. She  
144 has a background in health sciences and is a PhD student in medical education, focusing on  
145 physicians' lifelong learning. The research team also consisted of medical educators (MG and  
146 ED) and medical specialists (FS, GR, PT). FS and GR are experienced respiratory specialists.  
147 PT is specialised in gynaecology and obstetrics. SM is a medical education manager. All  
148 members of the research team are involved in medical education, having a special focus on  
149 workplace learning, continuing education or performance assessment. Their respective  
150 backgrounds might have influenced the research in presuming that physicians learn from daily  
151 patient encounters.

### 152 RESULTS

153 Our analysis revealed differences in how physicians reacted to, reflected on and learnt from  
154 various cues related to outpatient communication. The table below underlines potential cues  
155 that participants identified and the researcher observed (Table 2).

156 Table 2: Examples of different cues in patient interactions

| Cues physicians may react to | Examples                                                                                                 |
|------------------------------|----------------------------------------------------------------------------------------------------------|
| Circumstantial cues          | Time constraints                                                                                         |
|                              | Goal of the outpatient appointment                                                                       |
| Environmental cues           | Physical set-up of the room                                                                              |
| Patient characteristics      | Diagnosis, disease status, physical condition, age, gender, education, patient's mood, values or beliefs |
| Physician characteristics    | Physician's mood, values or beliefs                                                                      |

## Physicians' learning in the workplace: use of informal feedback cues in daily practice

---

|                    |                                                       |
|--------------------|-------------------------------------------------------|
| Interpersonal cues | Previously established physician-patient relationship |
|--------------------|-------------------------------------------------------|

---

157 In the following paragraphs, we first describe the variation in the physicians' communicative  
158 behaviour we observed within and across outpatient appointments. Subsequently, we report  
159 how physicians felt they learnt or did not learn from opportunities in their current practice.

### 160 **Variation in communication within and between patient encounters**

161 Physicians faced large variations of interactions in the outpatient setting. We noticed recurring  
162 behaviours in physicians' communication, which they indicated to have acquired from previous  
163 interactions.

164 Physicians' communication differed between patient encounters. They continuously adjusted to  
165 patients' reactions and circumstantial cues, smoothly manoeuvring through different patient  
166 encounters. One physician portrayed this as 'the game in the consulting room' (observational  
167 field notes, A7). They had a 'communication repertoire' at their disposal, which guided them  
168 through their daily routine while either deliberately or unconsciously reacting to context-specific  
169 cues:

170 It is actually just one strategy: ... that is, responding to what the patient gives you back.  
171 That can be really easy sometimes and passes very quickly, but other times you really  
172 need to manoeuvre carefully. ... I now have a huge repertoire of standard reactions that  
173 I can draw on ... . (Interview, A4)

174 Physicians' communication repertoire included, but was not limited to, different strategies of  
175 taking the lead in the conversation, drawing to illustrate or explain a diagnosis, prognosis or  
176 treatment, change in body language and/or non-verbal communication. Some observations  
177 showed, for instance, that physicians leaned forward to show interest in and empathy for the  
178 patient or to emphasise the severity of a patient's condition. Some used physical contact to  
179 comfort or console patients by shortly touching an emotional patient's hand or patting them on  
180 their back when saying goodbye. Similarly, physicians signalled the end of a consultation by  
181 leaning backwards, pushing back their chair or standing up.

182 Our participants realised that different factors, such as the atmosphere or goal of the  
183 consultation, the physical space of the clinic and time pressure, added complexity to the  
184 outpatient appointments. Recognising these circumstantial cues, they understood that patients  
185 might be agitated when coming for a test result or check-up after a treatment and had learnt to  
186 adjust their communication accordingly. One interviewee, for example, gauged the atmosphere  
187 during a patient encounter for deciding, deliberately, whether to open or wrap up a consult or  
188 reassure patients with a joke: [The physician jokes:] 'With this, you should be able to live to be a  
189 100. But I cannot give you any guarantee, of course.' (Observational field notes, A4) The same  
190 physician had made identical, age-related jokes in previous consultations. In another  
191 consultation, however, he remained distant and refrained from making jokes, because, as he

## Physicians' learning in the workplace: use of informal feedback cues in daily practice

192 explained afterwards, 'this was not the most cheerful patient'. These observations underline  
193 that, depending on the circumstances, physicians deliberately adapted their communication.  
194 Along with circumstantial cues such as atmosphere, workload or time constraints, interpersonal  
195 and personal cues also affected physician-patient communication, including the relationship  
196 previously established, physicians' and patients' mood as well as their norms, values and  
197 attitudes:

198       You only really get to know people if you see them often. ... At a regular check-up - I do  
199       think that when you see familiar people ... that I pay more attention to 'What kind of  
200       person was that again?' ... That is, I think, your mental preparation, and I think at that  
201       point you are already largely determining your communication strategy. (Interview, A2)

202 We observed how physicians adjusted their communication while anticipating their patients'  
203 reaction by slowing down, leaving a silence, increasingly using gestures or giving more detailed  
204 information. We could distinguish between *ad hoc* adjustments in reaction to an unexpected  
205 turn of events such as a patient bursting out in tears or a phone ringing, and planned behaviour  
206 in anticipation of the consultation flow (i.e. breaking bad news), as in the observed consultation  
207 described below:

208       A cancer patient and his partner return to discuss treatment options, because their son  
209       had expressed his dissatisfaction about the diagnosis and treatment option the trainee  
210       had given his father. The trainee asked the attending physician to lead the consultation  
211       and to discuss the diagnosis and treatment plan with the patient and his partner.

212       The physician explains the diagnosis. He speaks calmer than before when listing  
213       treatment options, pauses and gesticulates with his hands. 'Let me draw it. You will  
214       receive more information about this later, but schematically for now...'

215       The phone rings twice during the consultation. The physician silences it both times, the  
216       second time even without looking at the phone or pausing his explanations. When there  
217       is a third call, the trainee takes it.

218       The phone also rang during other consultations that day, but this time the physician did  
219       interrupt the ongoing conversation to answer it.

220       (Observational field notes, A7)

221 Physicians had developed a communication repertoire that enabled them to quickly adapt their  
222 behaviours depending on how various interrelated factors influenced the patient consultation.

### 223 **Learning from daily practice**

224 Our analysis of the observation and interview data revealed two possibilities of how physicians  
225 applied their communication repertoire in daily practice, recognising learning opportunities in  
226 past or present patient encounters. Although all physicians had acquired a daily routine, some  
227 were able to uncover learning opportunities within this routine and engaged in ongoing expertise  
228 development.



## Physicians' learning in the workplace: use of informal feedback cues in daily practice

229 Some physicians felt that they were no longer able or willing to learn or adjust. They felt that  
230 time constraints and daily routine took priority over using patient encounters as learning  
231 opportunities to adapt their communication. They remarked to be 'stuck in this pattern'  
232 (interview, A5), preventing them from learning communicative subtleties, and described that the  
233 ever-repeating routine had decreased sensitivity and willingness to learn from their interactions  
234 with patients. Reflecting retrospectively on their communication helped them realise how they  
235 had acquired their behaviour. Our interviews forced physicians to deliberate on the preceding  
236 patient encounters and potential learning opportunities. They were unconscious of their  
237 communication repertoire and how they used similar strategies across patients: 'How funny. ...  
238 It could be. ... I didn't know that I pushed my chair back, but now that you mention it, I think, oh  
239 yeah, that's right, I do that.' (Interview, A8).

240 Interviewees repeatedly mentioned that an absence of patient complaints implied that their  
241 communication repertoire was sufficient with no need for further development. They heavily  
242 relied on the repertoire built and believed they could 'no longer be corrected' (Interview, A5).  
243 While comprehending its importance, physicians hardly dwelt on their communication during or  
244 after patient encounters. Some struggled to pinpoint how they adapted their communication  
245 throughout patient encounters, which reflects an automatic behavioural adjustment. Others  
246 knew they used humour in their consultation but often mentioned it as an unintentional and  
247 automated strategy:

248         That way you try to keep it a bit personal, to put people at ease perhaps. ... But that is  
249         something that you sense unconsciously. It's not as if I think like 'oh, let's make a joke  
250         now', it's something that happens unknowingly, actually (interview, A10).

251 Even stronger, many considered their communication repertoire as part of their personality:  
252 'That's how I am. Some [physicians] are more cheerful or more business-like. It's not something  
253 you can switch on or off'. (Interview, A1). As one of our respondents explained:

254         If this is the right way or [if] it could be better, yes, that may be so, but this is *my* way.  
255         And I don't think that I'm doing it a lot differently now from the way I did it 10, 20 or 30  
256         years ago. (Interview, A5)

257 We found a notable contradiction in this response as the same physician claimed to still learn:

258         You know, frankly, that sounds very arrogant, but I don't think I'm doing a very bad job.  
259         But I know for sure that sometimes I can be entirely wrong. And I do try to learn from  
260         that. It touches me. It certainly touches me. (Interview, A5).

261 For this physician and most of his colleagues, ongoing learning does not represent a smooth  
262 learning curve, but occurs intermittently induced by emotion or critical events. Some indicated to  
263 learn from difficult or peculiar patient encounters, which were out the scope of our observations.  
264 They reported that those learning events often stood out from daily routine, 'ranging from  
265 someone who [is holding] a chair above his head and threatening you, so to speak, to people  
266 who ... well, all sorts of variations' (interview, A7). Critical incidents resulted in increased  
267 reflection which made physicians question their own behaviour and re-evaluate their



## Physicians' learning in the workplace: use of informal feedback cues in daily practice

268 communication repertoire. One of our physicians painfully described his communication as a  
269 shortcoming, because his patient continued smoking after repeated warnings. He believed to  
270 'be failing as a doctor' (interview and observational field note, A6) and recognised that he  
271 needed to learn how to deal with patients who trivialise their condition. This shows that despite  
272 having developed a reliable repertoire, physicians' learning behaviours may change when  
273 experiences elicit emotions, especially when they feel to have failed.

274 Other participants internalised regular reflection as part of practising, continuing  
275 improvement and learning from their practice. These physicians readily acknowledged that their  
276 communication repertoire was 'based on previous experiences' (interview, A4). They were  
277 aware of the constant yet subtle adaptations in their behaviour within and between patient  
278 encounters. Physicians used these to play 'the game in the consulting room' of deliberately fine-  
279 tuning and mastering their communication repertoire: 'You try to act on the patient's level. This  
280 morning, we had that farmer, right, that man who reacts primarily driven by his emotions with a  
281 certain rigidity and then you try to tune into that level' (Interview, A7). Some indicated that  
282 reflection on and learning from patient encounters had become fully ingrained in their daily  
283 practice: 'I'm always, I think, learning a bit anyway' (interview, A8). As someone explained in  
284 reaction to our observations:

285 Yes, I do think that I actually always take note, when the patient [is] in the consulting  
286 room or [when I] start preparing for the next patient. Like, ... for this patient, but also for  
287 similar cases, ... how do I say that in plain and clear language? ... I did learn from this  
288 and reflected [on it] again and that's actually how I do it every time. (Interview, A2)

## 289 DISCUSSION

290 We aimed to explore how physicians use cues from their clinical practice as informal feedback  
291 to adjust their communication and learn from daily patient interactions. Our data showed  
292 variation in physicians' communication patterns within and across outpatient encounters  
293 influenced by personal, interpersonal and contextual factors. Physicians reported to have learnt  
294 from previous interactions, which established a communication repertoire that guided them  
295 through their practice. We described different degrees of the extent to which physicians  
296 recognised and used informal feedback from daily practice as cues for learning and learning  
297 opportunities.

298 The two opposites we present show that some physicians are less likely to engage in reflection  
299 and deliberate learning from day-to-day patient care, whereas others appeared more sensitive  
300 to learning cues to reflect and adapt their communication. Some of our participants were caught  
301 up in the demands of daily practice and did not have the time or willingness to reflect on their  
302 communication repertoire. According to Ericsson's model of deliberate practice and expert  
303 performance (9), these physicians were in a phase of arrested development. Yet, they felt  
304 competent in their performance and would potentially reinitiate a learning process in response  
305 to critical events. Others continuously challenged their communication repertoire to ultimately

## Physicians' learning in the workplace: use of informal feedback cues in daily practice

306 increase control over unknown situations (24). They reflected on whether they had used their  
307 repertoire effectively and efficiently which allowed them to smoothly navigate through practice  
308 as an indicator of mastery and expert performer (9). This variation in physicians' willingness to  
309 lifelong learning reflects on previous findings on expertise development (9, 25). Mylopoulos et  
310 al. (25) argue that adaptive experts may not only recognise the "old in the new" but that they  
311 also reconceptualise their practice by reflecting on the "new in the old". This echoes our findings  
312 that some physicians may regard patient encounters as learning opportunities to confirm or fine-  
313 tune their communication repertoire. It also induces the questions about which factors influence  
314 physicians' position on the learning curve, or how we can create a stimulating work environment  
315 for all physicians to become lifelong learners.

316 The way participants in our study described and reflected on the development and use of their  
317 communication repertoire reflects findings from a recent study on how trainees develop  
318 expertise in communication (26). Kawamura, Harris (26) and colleagues (26) distinguish  
319 between procedural fluency and conceptual understanding in expertise development in  
320 communication. The use of humour or physical contact to comfort a patient can be considered  
321 procedural fluency, whereas 'shifting' between patients and moving towards patients' 'level'  
322 reflects a physician's conceptual understanding of distinct patient needs (26). Adaptive experts  
323 thus command a conceptual understanding of when to use their established communication  
324 repertoire and when to adapt how they communicate their clinical knowledge to different  
325 patients or when to innovate strategies for adapting to non-routine situations. Findings from our  
326 study seem to confirm Kawamura and colleagues' conclusion that learning how to 'shift'  
327 between patients is key to expertise development in communication.

328 The degree of willingness and sensitivity to recognise learning opportunities that we describe,  
329 stress Teunissen and Bok's reflection on goal orientation and self-theories (27). Their distinction  
330 between incremental and entity theorists shows parallels to our results (27, 28). Physicians who  
331 reflected on their actions and emotions, and who continuously tested their communication  
332 repertoire showed signs of a growth mind-set. They appeared as intrinsically motivated lifelong  
333 learners and adaptive experts. Among our participants, we, however, also recognised  
334 individuals who were more performance-oriented. They were mainly absorbed in the acquired  
335 routine and considered the absence of patient complaints as affirmation of good practice.  
336 Possibly, contextual factors within daily practice had diminished their incremental mind-set over  
337 time which hints at possibilities for improving the overall learning climate in hospital departments  
338 (28). Engaging physicians in lifelong learning may require a culture in which the tension  
339 between performance and continuing learning is recognised. When physicians are given the  
340 opportunity to reflect more on their communicative behaviour during patient care, through formal  
341 and informal feedback, a growth-mind-set may be stimulated.

342 Contextual factors such as workload and time pressure in the clinical workplace may impede  
343 physicians' reflection on learning cues and their learning (17, 29-31). Some of our participants  
344 were more sensitive to time pressure and preoccupied with daily routine than others, which may

## Physicians' learning in the workplace: use of informal feedback cues in daily practice

345 explain the individual differences in how deliberately our participants recognised learning  
346 opportunities. This aligns with the findings of Kyndt and colleagues (30) who suggest that  
347 learners' characteristics as well as organisation type and size determine the acknowledgement  
348 of learning opportunities at work. Engaging physicians in lifelong learning may thus require a  
349 culture which pro-actively stimulates reflection and the development of a growth mind-set and  
350 adaptive expertise.

### 351 **Implications in relation to lifelong learning**

352 Our results indicate that we may need to support physicians in engaging in reflection on action,  
353 while being cautious of potentially negative effects. We need to balance routine practice with  
354 reflective practice (to support development and maintenance of expert performance) since  
355 continuous reflection may hinder physicians in delivering care (9). That is, physicians need to  
356 have a certain level of automaticity to practise considering the increasing practice demands and  
357 contextual factors such as workload and time pressure.

358 Nonetheless, if feedback and reflection are truly valued as essential attributes for lifelong  
359 learning, more importance must be placed upon physicians' awareness of their own behaviour  
360 during practice, combined with a willingness to learn in order to improve. The UK revalidation  
361 system, as one of few national recertification systems, already requires physicians to reflect on  
362 critical incidents, feedback received, and complements or complaints during an annual  
363 appraisal. Although this creates workplace-based opportunities for physicians' learning,  
364 physicians are likely to reflect on aggregated data only, de-emphasizing learning-in-context.  
365 Rather, if we want to stimulate more reflective behaviour in practice, we may consider it as a  
366 collective effort by creating an environment that stimulates learning. Physicians could, for  
367 instance, occasionally observe peers to face diverse communication approaches to learn for  
368 their own practice, similar to how trainees learn from observing faculty (26, 32). To initiate  
369 collaborative learning, physicians could also engage in peer consultation and share experiences  
370 and recent learning as described by Mylopoulos et al. as "discover then tell" (25). Those who  
371 are capable of discovering learning opportunities among patient interactions, could guide their  
372 colleagues who are less sensitive to cues in a collective effort to engage in deliberate practice  
373 (9). Perhaps some of these collective learning activities could then serve as evidence that a  
374 physician contributes to a learning environment as a marker for recertification.

### 375 **Strengths and limitations**

376 A first limitation is that we base our data on single day observations and self-perceived learning  
377 strategies. We did not observe the same physician for a longer period of time. Following a  
378 number of physicians longer, would have resulted in multiple observations on physicians'  
379 learning behaviour, also outside of the outpatient setting. We collected data in outpatient clinics  
380 for respiratory disease, observing and interviewing respiratory specialists. Both hospitals were  
381 teaching hospitals. This might present another limitation as physicians working there might be  
382 more aware of and involved in others' or their own learning due to their teaching role. These

## Physicians' learning in the workplace: use of informal feedback cues in daily practice

383 physicians might have (developed) a more learning-focused mind-set than physicians without  
384 educational duties. It would be worthwhile exploring how physicians learn informally in a non-  
385 teaching context. In the Netherlands, recertification procedures and requirements to guide  
386 physicians' lifelong learning are similar across medical specialties. This makes our results  
387 transferable to other specialties, particularly considering that variations between and within  
388 individuals are presumably present across all specialties. Research in other specialties or  
389 clinical contexts and settings, however, may lead to different findings.

390 A strength of our study was the combination between non-participant observations and  
391 interviews. Many others have previously recommended this combination of methods to present  
392 data on what physicians report themselves but also on what can be observed (11, 17, 18).  
393 Observing physicians in the outpatient setting was instrumental to help us to explore learnt  
394 behaviour and learning opportunities in practice.

### 395 **Conclusion**

396 There is a large variation in how physicians use learning opportunities in outpatient settings.  
397 Their informal learning is influenced by contextual, personal and interpersonal factors, which  
398 might either promote or inhibit physicians' reflection and learning. Our findings suggest that  
399 there is some importance that can be attributed to making physicians more aware of when and  
400 how they can learn from daily practice, also in collaboration with others. Learning from daily  
401 practice is a collaborative effort and requires a learning culture, in which physicians can use  
402 existing differences between their own and their peers' performance to learn from each other.

### 403 **REFERENCES**

- 404 1. Sargeant J, Mann K, Sinclair D, Ferrier S, Muirhead P, van der Vleuten C, et al. Learning in  
405 practice: experiences and perceptions of high-scoring physicians. *Acad Med.* 2006;81(7):655-60.
- 406 2. Cuyvers K, Donche V, Van den Bossche P. Learning beyond graduation: exploring newly  
407 qualified specialists' entrance into daily practice from a learning perspective. *Adv Health Sci Educ*  
408 *Theory Pract.* 2016;21(2):439-53.
- 409 3. Raza A, Coomarasamy A, Khan KS. Best evidence continuous medical education. *Arch Gynecol*  
410 *Obstet.* 2009;280(4):683-7.
- 411 4. Eraut M. Informal learning in the workplace. *Stud Cont Educ.* 2004;26(2):247-73.
- 412 5. Berkhout JJ, Helmich E, Teunissen PW, van der Vleuten CPM, Jaarsma ADC. Context matters  
413 when striving to promote active and lifelong learning in medical education. *Med Educ.* 2018;52(1):34-44.
- 414 6. Sehlbach C, Govaerts MJB, Mitchell S, Rohde GGU, Smeenk FWJM, Driessen EW. Box-ticking  
415 and Olympic high jumping – Physicians' perceptions and acceptance of national physician validation  
416 systems. *Med Teach.* 2018;40(9):886-91.
- 417 7. Boileau T. Informal learning. In: West RE, editor. *Foundations of Learning and Instructional*  
418 *Design Technology; The Past, Present, and Future of Learning and Instructional Design Technology:*  
419 *EdTech Books;* 2018. p. 201-14.
- 420 8. Marsick VJ, Watkins KE. Informal and incidental learning. *New directions for adult and*  
421 *continuing education.* 2001;2001(89):25-34.
- 422 9. Ericsson KA. Deliberate Practice and the Acquisition and Maintenance of Expert Performance in  
423 *Medicine and Related Domains.* *Acad Med.* 2004;79(10):S70-S81.
- 424 10. Ericsson KA, Krampe RT, Tesch-Römer C. The role of deliberate practice in the acquisition of  
425 expert performance. *Psychol Rev.* 1993;100(3):363.
- 426 11. van de Wiel MWJ, Szegedi, K. H. P., & Weggeman, M. C. D. P. . Professional learning :  
427 deliberate attempts at developing expertise Professional Learning: Gaps and transitions on the way from

## Physicians' learning in the workplace: use of informal feedback cues in daily practice

- 428 novice to expert. In: H. Boshuizen RB, & H. Gruber, editor. Innovation and Change in Professional  
429 Education. 2. Dordrecht: Kluwer Academic Publishers; 2004. p. 181-206.
- 430 12. van de Wiel MWJ, Van den Bossche P. Deliberate Practice in Medicine: The Motivation to  
431 Engage in Work-Related Learning and Its Contribution to Expertise. *Vocations and Learning*.  
432 2013;6(1):135-58.
- 433 13. Nisbet G, Lincoln M, Dunn S. Informal interprofessional learning: an untapped opportunity for  
434 learning and change within the workplace. *Journal of Interprofessional Care*. 2013;27(6):469-75.
- 435 14. Ha JF, Longnecker N. Doctor-Patient Communication: A Review. *Ochsner Journal*.  
436 2010;10(1):38-43.
- 437 15. Regehr G, Mylopoulos M. Maintaining competence in the field: Learning about practice, through  
438 practice, in practice. *J Contin Educ Health*. 2008;28(S1):19-23.
- 439 16. Moulton C-aE, Regehr G, Mylopoulos M, MacRae HM. Slowing Down When You Should: A  
440 New Model of Expert Judgment. *Acad Med*. 2007;82(10):S109-S116.
- 441 17. van de Wiel MWJ, Van den Bossche P, Janssen S, Jossberger H. Exploring deliberate practice in  
442 medicine: how do physicians learn in the workplace? *Adv Health Sci Educ Theory Pract*. 2011;16(1):81-  
443 95.
- 444 18. Watling C, Driessen E, van der Vleuten CPM, Lingard L. Learning from clinical work: the roles  
445 of learning cues and credibility judgements. *Med Educ*. 2012;46(2):192-200.
- 446 19. Lockyer J, Armson H, Chesluk B, Dornan T, Holmboe E, Loney E, et al. Feedback data sources  
447 that inform physician self-assessment. *Med Teach*. 2011;33(2):e113-20.
- 448 20. Reeves S, Peller J, Goldman J, Kitto S. Ethnography in qualitative educational research: AMEE  
449 Guide No. 80. *Med Teach*. 2013;35(8):e1365-e79.
- 450 21. Atkinson P, Pugsley L. Making sense of ethnography and medical education. *Med Educ*.  
451 2005;39(2):228-34.
- 452 22. Dey I. Grounding grounded theory: Guidelines for qualitative inquiry: Crane Library at the  
453 University of British Columbia; 2012.
- 454 23. Morse JM. The Significance of Saturation. *Qualitative Health Research*. 1995;5(2):147-9.
- 455 24. Cook DA, Artino Jr AR. Motivation to learn: an overview of contemporary theories. *Med Educ*.  
456 2016;50(10):997-1014.
- 457 25. Mylopoulos M, Brydges R, Woods NN, Manzone J, Schwartz DL. Preparation for future  
458 learning: a missing competency in health professions education? *Med Educ*. 2016;50(1):115-23.
- 459 26. Kawamura A, Harris I, Thomas K, Mema B, Mylopoulos M. Exploring How Pediatric Residents  
460 Develop Adaptive Expertise in Communication: The Importance of "Shifts" in Understanding Patient and  
461 Family Perspectives. *Acad Med*. 2019; Publish Ahead of Print.
- 462 27. Teunissen PW, Bok HG. Believing is seeing: how people's beliefs influence goals, emotions and  
463 behaviour. *Med Educ*. 2013;47(11):1064-72.
- 464 28. Dweck CS. *Self-theories: Their role in motivation, personality, and development*: Psychology  
465 press; 2013.
- 466 29. Hoffman KG, Donaldson JF. Contextual tensions of the clinical environment and their influence  
467 on teaching and learning. *Med Educ*. 2004;38(4):448-54.
- 468 30. Kyndt E, Dochy, F., Nijs, H. Learning conditions for non-formal and informal workplace  
469 learning. *J Workplace Learn*. 2009;21(5):369-83.
- 470 31. Swanwick T. Informal learning in postgraduate medical education: from cognitivism to  
471 'culturism'. *Med Educ*. 2005;39(8):859-65.
- 472 32. Hatano G IK. Two courses of expertise. In: Stevenson H AH, Hakuta K., editor. *Child  
473 Development and Education in Japan*. New York, NY: W. H. Freeman and Company; 1986.
- 474
